# Supplementary material for: Characterization of biochars derived from different materials and their effects on microbial dechlorination of pentachlorophenol in a consortium
Source: Royal Society of Chemistry journal article supplement (doi:10.1039/c8ra09410a), 2019-01-01
Supplement: c8ra09410a1.pdf [file c8ra09410a1.pdf]

**Characterization of biochars derived from different materials and their effects on  
microbial dechlorination of pentachlorophenol in a consortium**

Chunfang Zhang<sup>a,1</sup>, Ning Zhang<sup>a,1</sup>, Zhixing Xiao<sup>b</sup>, Zhiling Li<sup>c</sup>, Dongdong Zhang<sup>a\*</sup>

<sup>a</sup> Institute of Marine Biology, Ocean College, Zhejiang University, Zhoushan 316021,  
China

<sup>b</sup> College of Urban Construction, Nanjing Tech University, Nanjing 211800, China

<sup>c</sup> State Key Laboratory of Urban Water Resources and Environment, School of  
Environment, Harbin Institute of Technology, Harbin 150090, China

\*Corresponding Author:

Dongdong Zhang

Institute of Marine Biology, Ocean College, Zhejiang University, Zhoushan 316021,  
Zhejiang, China

Tel: +86-13522550565

E-mail: zhangdongzju@zju.edu.cn

<sup>1</sup> These authors contributed equally to this study and are joint first authors.

Table S1 Electrochemical characteristics of the biochars used in this study

| Biochar type | EC<br>( $\mu\text{s cm}^{-1}$ ) | EAC<br>( $\mu\text{mol e}^{-} \text{g}^{-1}$ ) | EDC<br>( $\mu\text{mol e}^{-} \text{g}^{-1}$ ) | ETC<br>( $\mu\text{mol e}^{-} \text{g}^{-1}$ ) |
|--------------|---------------------------------|------------------------------------------------|------------------------------------------------|------------------------------------------------|
| Rice husk    | 40.00±1.22                      | 63.46±3.80                                     | 86.49±4.28                                     | 149.96±3.08                                    |
| Bamboo       | 1.25±1.22                       | 73.98±5.91                                     | 81.85±5.28                                     | 155.83±7.20                                    |
| Caragana     | (2.22±0.53)×10 <sup>6</sup>     | 21.72±2.92                                     | 27.65±2.51                                     | 49.37±1.43                                     |
| Garbage      | (1.04±0.03)×10 <sup>3</sup>     | 22.18±2.51                                     | 39.45±2.75                                     | 61.63±2.26                                     |

Notes: Electrical conductivity, EC; electron-accepting capacity, EAC; electron-donating capacity, EDC; electron transfer capacity, ETC. The EC, EAC, EDC, and ETC data show the mean values of three datasets.

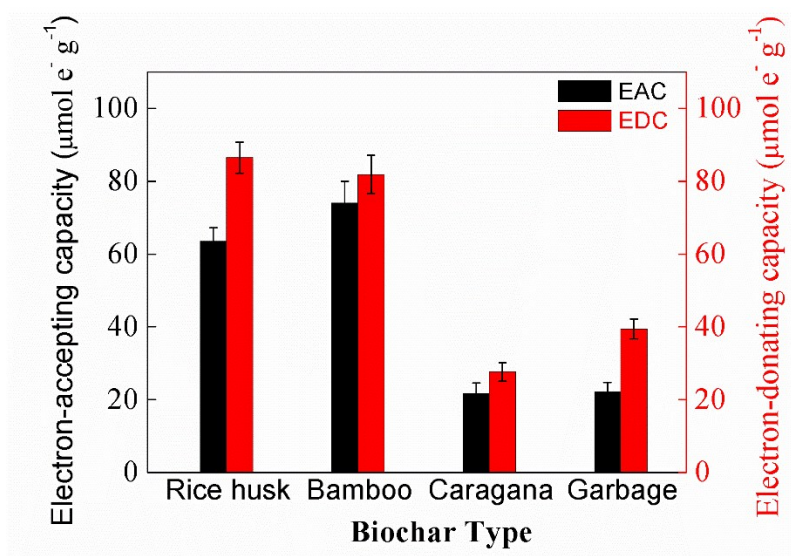

Fig. S1 Electron-accepting capacity (EAC) of biochars produced from four different raw materials at a potential of  $-0.7$  V, and electron-donating capacity (EDC) at a potential of  $+0.5$  V (vs. Ag/AgCl). The error bars show the difference of three data sets.

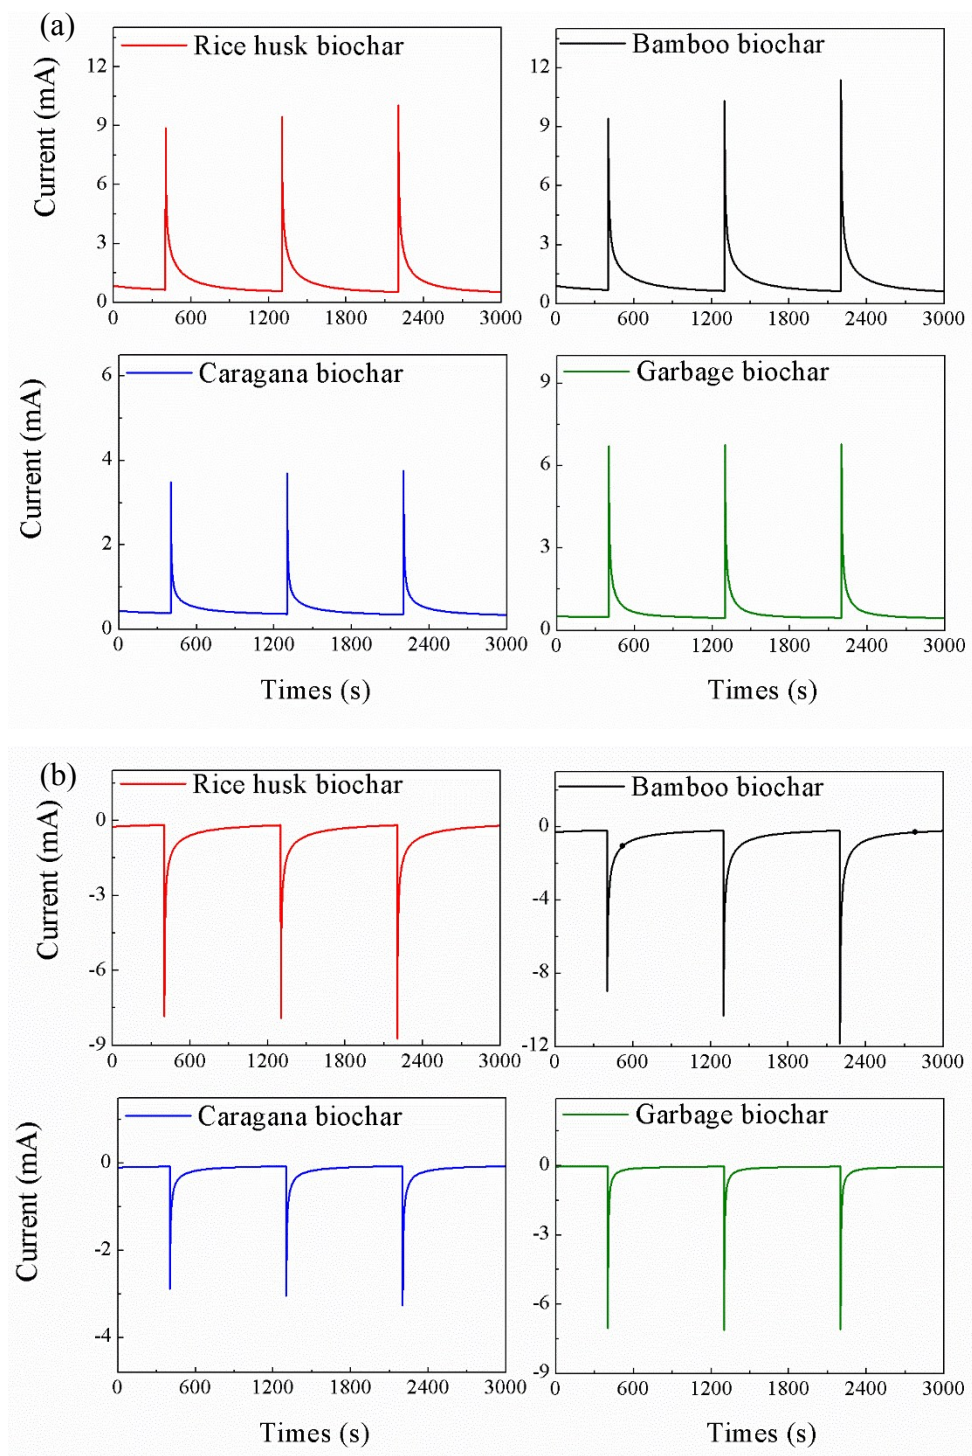

Fig. S2 Reductive and oxidative current responses to biochars produced from four different raw materials analyzed by electrochemical oxidation under +0.5 V (a) and electrochemical reduction under -0.7 V (b). The peak areas were used to calculate the EACs and EDCs of biochars.

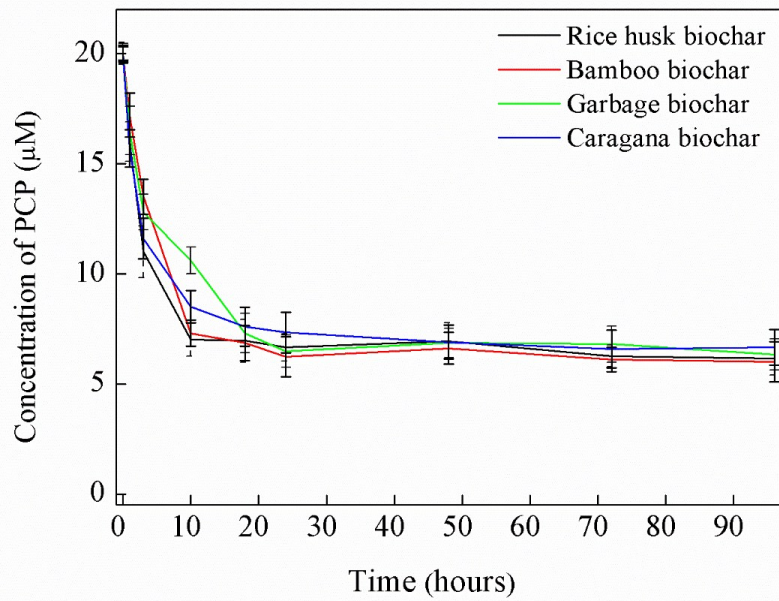

Fig. S3 Adsorption of PCP by different biochars. For this experiment, the concentrations of PCP in the aqueous phase in the presence of different biochars (10 g L<sup>-1</sup>) were quantified by gas chromatograph–mass spectrometer.
